# Supplementary material for: Early life inter-kingdom interactions shape the immunological environment of the airways
Source: PubMed Central journal article supplement (PMC8862481; doi:10.1186/s40168-021-01201-y), 2022-02-21
Supplement: 40168_2021_1201_MOESM2_ESM.pdf [file 40168_2021_1201_MOESM2_ESM.pdf]

## Supplementary Information

### Early life inter-kingdom interactions shape the immunological environment of the airways

| <b>Metadata</b>                  | <b>Median (IQ range) / Number (%)</b> |
|----------------------------------|---------------------------------------|
| Postnatal age (days)             | 8 (7-8)                               |
| Gestational age at birth (weeks) | 39 (39-40)                            |
| Weight at birth (gr)             | 3346 (3042-3672)                      |
| Ethnicity                        | 93 White British (77%), Other (23%)   |
| Sex                              | 65 (54%) Female, 56 (46%) Male        |
| Delivery mode                    | 67 (55%) Vaginal, 54 (45%) C-section  |
| Breastfeeding (first week)       | 87 (72%) Yes, 34 (28%) No             |
| Country of birth                 | 69 (57%) England, 52 (43%) Scotland   |
| Antibiotics during pregnancy     | 121 (100%) No treatment               |
| Postnatal antibiotics            | 121 (100%) No treatment               |

**Supplementary Table 1.** Participants baseline characteristics. Values represent medians with interquartile range for continuous variables and absolute numbers with percentages for categorical variables.

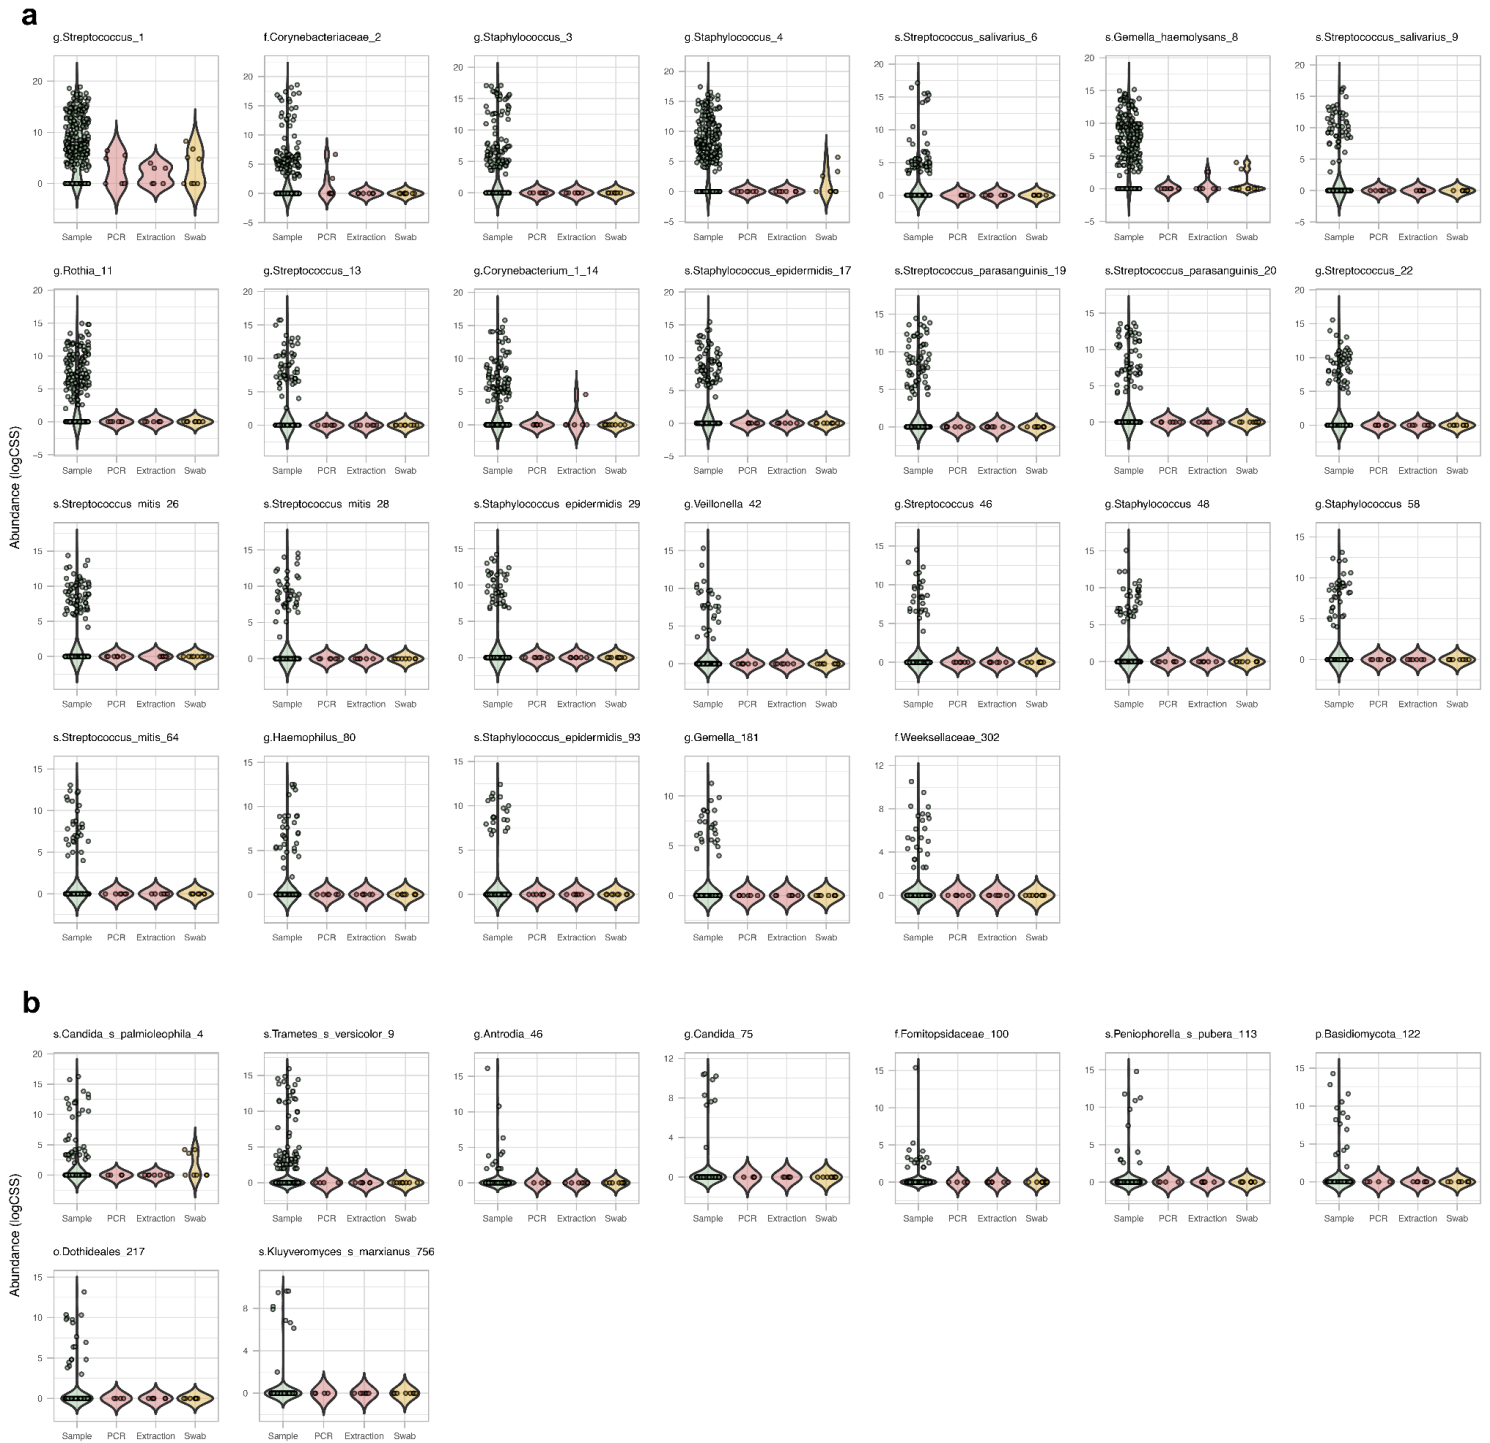

**Supplementary Figure 1. a** Relative abundance of differentially abundant bacterial genera in samples versus negative controls (logCSS). **b** Corresponding plots for fungi.
